# Supplementary material for: A novel nucleophilic approach to 1-alkyladenosines. A two-step synthesis of [1-15N]adenosine from inosine
Source: Royal Society of Chemistry journal article supplement (doi:10.1039/b505183e), 2005-01-01
Supplement: b505183e.pdf [file b505183e.pdf]

# A novel nucleophilic approach to 1-alkyladenosines. A two-step synthesis of [1-<sup>15</sup>N]adenosine from inosine

M. Terrazas, X. Ariza, J. Farràs, and J. Vilarrasa.

## **2',3',5'-Tri-*O*-acetyl-1-(2,4-dinitrobenzenesulphonyl)inosine (2a).**

<sup>1</sup>H NMR (CDCl<sub>3</sub>, 400 MHz)  $\delta$  2.10 (s, 3H), 2.14 (s, 3H), 2.16 (s, 3H), 4.38 (dd,  $J = 4.2$ , 12.3 Hz, 1H), 4.42 (dd,  $J = 3.1$ , 12.3 Hz, 1H), 4.48 (m, 1H), 5.54 (dd,  $J = 5.6$ , 4.5 Hz, 1H), 5.75 (dd,  $J = 5.4$ , 5.6 Hz, 1H), 6.17 (d,  $J = 5.4$  Hz, 1H), 8.02 (s, 1H), 8.62 (s, 1H), 8.66 (d,  $J = 2.1$  Hz, 1H), 8.70 (dd,  $J = 2.1$ , 8.8 Hz, 1H), 8.96 (d,  $J = 8.8$ , 1H). <sup>13</sup>C NMR (CDCl<sub>3</sub>, 100 MHz)  $\delta$  20.2, 20.4, 20.7, 62.8, 70.4, 73.6, 80.7, 86.5, 120.4, 124.2, 126.9, 134.6, 138.6, 139.3, 143.8, 146.9, 148.5, 151.2, 153.5, 169.2, 169.5, 170.2. HRMS (FAB) calcd for C<sub>22</sub>H<sub>21</sub>N<sub>6</sub>O<sub>14</sub>S (M+H)<sup>+</sup> 625.0836, found 625.0860.

## **3',5'-Di-*O*-acetyl-2'-deoxy-1-(2,4-dinitrobenzenesulphonyl)inosine (2b).**

<sup>1</sup>H NMR (CDCl<sub>3</sub>, 400 MHz)  $\delta$  2.09 (s, 3H), 2.15 (s, 3H), 2.69 (ddd,  $J = 6.0$ , 2.6, 14.2 Hz, 1H), 2.81 (ddd,  $J = 7.6$ , 6.4, 14.2 Hz, 1H), 4.32-4.40 (m, 3H), 5.40 (m, 1H), 6.40 (dd,  $J = 6.0$ , 7.6 Hz, 1H), 8.00 (s, 1H), 8.61 (s, 1H), 8.67 (d,  $J = 2.1$  Hz, 1H), 8.70 (dd,  $J = 2.1$ , 8.8 Hz, 1H), 8.98 (d,  $J = 8.8$  Hz, 1H). <sup>13</sup>C NMR (CDCl<sub>3</sub>, 100 MHz)  $\delta$  20.7, 20.9, 38.4, 63.5, 74.1, 82.9, 84.9, 120.3, 124.2, 126.9, 134.8, 138.7, 139.1, 143.5, 146.7, 148.6, 151.2, 153.6, 170.2, 170.3. HRMS (FAB) calcd for C<sub>20</sub>H<sub>19</sub>N<sub>6</sub>O<sub>12</sub>S (M+H)<sup>+</sup> 567.0782, found 567.0755.

## **[1-<sup>15</sup>N]-2',3',5'-Tri-*O*-acetyl-1-(2,4-dinitrobenzenesulphonyl)inosine (2a<sup>15</sup>).**

<sup>1</sup>H NMR (CDCl<sub>3</sub>, 400 MHz)  $\delta$  2.10 (s, 3H), 2.14 (s, 3H), 2.16 (s, 3H), 4.36-4.49 (m, 3H), 5.54 (dd,  $J = 5.6$ , 4.5 Hz, 1H), 5.75 (dd,  $J = 5.4$ , 5.6 Hz, 1H), 6.16 (d,  $J = 5.4$  Hz, 1H), 7.98 (s, 1H), 8.63 (d,  $J = 6.4$  Hz, 1H), 8.66 (d,  $J = 2.1$  Hz, 1H), 8.70 (dd,  $J = 8.8$ , 2.1 Hz, 1H), 8.98 (d,  $J = 8.8$  Hz, 1H). <sup>13</sup>C NMR (CDCl<sub>3</sub>, 100 MHz)  $\delta$  20.3, 20.5, 20.7, 62.8, 70.4, 73.6, 80.7, 86.5, 120.3, 124.4 (d,  $J = 9.2$  Hz), 126.8, 134.8 (d,  $J = 4.6$  Hz), 138.9, 139.2, 143.8 (d,  $J = 3.8$  Hz), 147.0, 148.7, 151.2, 153.5 (d,  $J = 3.8$  Hz), 169.2, 169.5, 170.2. <sup>15</sup>N NMR (CDCl<sub>3</sub>, 30 MHz)  $\delta$  -168.1 (10 M H<sup>15</sup>NO<sub>3</sub> as the external reference). HRMS (FAB) calcd for C<sub>22</sub>H<sub>21</sub>N<sub>5</sub><sup>15</sup>NO<sub>14</sub>S (M+H)<sup>+</sup> 626.0807, found 626.0809.

## **[6-<sup>18</sup>O]-2',3',5'-Tri-*O*-acetyl-1-(2,4-dinitrobenzenesulphonyl)inosine (2a<sup>18</sup>).**

HRMS (FAB) calcd for C<sub>22</sub>H<sub>21</sub>N<sub>6</sub>O<sub>13</sub><sup>18</sup>OS (M+H)<sup>+</sup> 627.0879, found 627.0873.

## **[1-<sup>15</sup>N]-2',3',5'-Tri-*O*-acetyladenosine (3a\*).**

<sup>1</sup>H NMR (CDCl<sub>3</sub>, 400 MHz)  $\delta$  2.09 (s, 3H), 2.13 (s, 3H), 2.15 (s, 3H), 4.38 (dd,  $J = 5.4$ , 11.2 Hz, 1H), 4.43-4.47 (m, 2H), 5.67 (dd,  $J = 5.4$ , 4.6 Hz, 1H), 5.82 (bs, 2H), 5.93 (dd,

$J = 5.4, 5.3$  Hz, 1H), 6.18 (d,  $J = 5.3$  Hz, 1H), 7.97 (s, 1H), 8.37 (d,  $J = 15.2$  Hz, 1H).  $^{13}\text{C}$  NMR ( $\text{CDCl}_3$ , 100 MHz)  $\square$  20.4, 20.5, 20.7, 63.1, 70.6, 73.2, 80.3, 86.2, 120.1 (d,  $J = 2.5$  Hz), 138.9, 149.8 (d,  $J = 3.0$  Hz), 152.9 (d,  $J = 2.0$  Hz), 155.3 (d,  $J = 5.4$  Hz), 169.4, 169.6, 170.3.  $^{15}\text{N}$  NMR ( $\text{CDCl}_3$ , 30 MHz)  $\square$  -175.4 (10 M  $\text{H}^{15}\text{NO}_3$  as the external reference). HRMS (FAB) calcd for  $\text{C}_{16}\text{H}_{20}\text{N}_4^{15}\text{NO}_7$  (M+H) $^+$  395.1333, found 395.1333.

**[1- $^{15}\text{N}$ ]-3',5'-Di-*O*-acetyl-2'-deoxyadenosine (3b\*).**

$^1\text{H}$  NMR ( $\text{CDCl}_3$ , 400 MHz)  $\square$  2.09 (s, 3H), 2.11 (s, 3H), 2.63 (ddd,  $J = 5.9, 2.5, 14.3$  Hz, 1H), 2.96 (ddd,  $J = 8.0, 6.4, 14.3$  Hz, 1H), 4.33-4.44 (m, 3H), 5.44 (m, 1H), 5.82 (bs, 2H), 6.44 (dd,  $J = 5.9, 8.0$ , 1H), 7.99 (s, 1H), 8.35 (d,  $J = 15.2$  Hz, 1H).  $^{13}\text{C}$  NMR ( $\text{CDCl}_3$ , 100 MHz)  $\square$  20.8, 20.9, 37.5, 63.7, 74.5, 82.5, 84.5, 120.1 (d,  $J = 2.0$  Hz), 138.5, 149.6 (d,  $J = 2.6$  Hz), 153.1 (d,  $J = 1.5$  Hz), 155.5 (d,  $J = 4.6$  Hz), 170.3, 170.4.  $^{15}\text{N}$  NMR ( $\text{CDCl}_3$ , 30 MHz)  $\square$  -184.0 (10 M  $\text{H}^{15}\text{NO}_3$  as the external reference). HRMS (FAB) calcd for  $\text{C}_{14}\text{H}_{18}\text{N}_4^{15}\text{NO}_5$  (M+H) $^+$  337.1278, found 337.1266.

**[6- $^{15}\text{NH}_2$ ]-2',3',5'-Tri-*O*-acetyladenosine (3a ).**

$^1\text{H}$  NMR ( $\text{CDCl}_3$ , 400 MHz)  $\square$  2.09 (s, 3H), 2.13 (s, 3H), 2.15 (s, 3H), 4.36-4.47 (m, 3H), 5.67 (dd,  $J = 5.4, 4.6$  Hz, 1H), 5.91 (d,  $J = 90.4$  Hz, 2H), 5.93 (dd,  $J = 5.4, 5.3$  Hz, 1H), 6.19 (d,  $J = 5.3$ , 1H), 7.98 (s, 1H), 8.37 (s, 1H).  $^{13}\text{C}$  NMR ( $\text{CDCl}_3$ , 100 MHz)  $\square$  20.4, 20.5, 20.7, 63.1, 70.6, 73.2, 80.3, 86.3, 120.1, 139.0, 149.7, 152.9 (d,  $J = 2.0$  Hz), 155.3 (d,  $J = 20.6$  Hz), 169.4, 169.6, 170.3.  $^{15}\text{N}$  NMR ( $\text{CDCl}_3$ , 30 MHz)  $\square$  -273.4 (10 M  $\text{H}^{15}\text{NO}_3$  as the external reference). HRMS (FAB) calcd for  $\text{C}_{16}\text{H}_{20}\text{N}_4^{15}\text{NO}_7$  (M+H) $^+$  395.1333, found 395.1331.

**2',3',5'-Tri-*O*-acetyl-1-benzyladenosine (4a).**

$^1\text{H}$  NMR ( $\text{CDCl}_3$ , 400 MHz)  $\square$  2.09 (s, 3H), 2.12 (s, 6H), 4.30-4.43 (m, 3H), 5.26 (s, 2H), 5.61 (dd,  $J = 5.5, 4.8$  Hz, 1H), 5.86 (dd,  $J = 5.5, 5.0$  Hz, 1H), 6.00 (d,  $J = 5.0$  Hz, 1H), 7.30-7.36 (m, 5H), 7.73 (s, 1H), 7.74 (s, 1H).  $^{13}\text{C}$  NMR ( $\text{CDCl}_3$ , 100 MHz)  $\square$  20.4, 20.5, 20.7, 49.9, 63.0, 70.4, 73.2, 80.1, 86.5, 124.4, 127.8, 128.0, 128.9, 136.0, 136.9, 141.3, 147.7, 154.5, 169.3, 169.5, 170.3. HRMS (FAB) calcd for  $\text{C}_{23}\text{H}_{26}\text{N}_5\text{O}_7$  (M+H) $^+$  484.1832, found 484.1833.

**2',3',5'-Tri-*O*-acetyl-1-ethyladenosine (4b).**

$^1\text{H}$  NMR ( $\text{CDCl}_3$ , 400 MHz)  $\square$  1.45 (t,  $J = 7.0$  Hz, 3H), 2.09 (s, 3H), 2.12 (s, 3H), 2.14 (s, 3H), 4.19 (q,  $J = 7.0$  Hz, 2H), 4.32-4.45 (m, 3H), 5.62 (dd,  $J = 5.5, 4.8$  Hz, 1H), 5.90 (dd,  $J = 5.5, 5.1$  Hz, 1H), 6.03 (d,  $J = 5.1$  Hz, 1H), 7.78 (s, 1H), 7.95 (s, 1H).  $^{13}\text{C}$  NMR ( $\text{CDCl}_3$ , 100 MHz)  $\square$  14.4, 20.4, 20.5, 20.7, 45.9, 63.1, 70.5, 73.1, 80.2, 86.7, 124.0, 138.1, 143.8, 147.0, 153.4, 169.3, 169.5, 170.4. HRMS (FAB) calcd for  $\text{C}_{18}\text{H}_{24}\text{N}_5\text{O}_7$  (M+H) $^+$  422.1676, found 422.1679.

**2',3',5'-Tri-*O*-acetyl-1-butyladenosine (4c).**

<sup>1</sup>H NMR (CDCl<sub>3</sub>, 400 MHz)  $\delta$  0.97 (t,  $J = 7.4$  Hz, 3H), 1.42 (m, 2H), 1.81 (m, 2H), 2.10 (s, 3H), 2.12 (s, 3H), 2.14 (s, 3H), 4.06 (t,  $J = 7.4$  Hz, 2H), 4.33-4.45 (m, 3H), 5.61 (dd,  $J = 5.5, 4.8$  Hz, 1H), 5.88 (dd,  $J = 5.5, 5.1$  Hz, 1H), 6.01 (d,  $J = 5.1$  Hz, 1H), 7.70 (s, 1H), 7.79 (s, 1H). <sup>13</sup>C NMR (CDCl<sub>3</sub>, 100 MHz)  $\delta$  13.7, 19.8, 20.4, 20.5, 20.7, 30.7, 48.0, 63.1, 70.5, 73.1, 80.1, 86.5, 124.1, 137.2, 141.7, 147.5, 154.0, 169.3, 169.5, 170.3. HRMS (FAB) calcd for C<sub>20</sub>H<sub>28</sub>N<sub>5</sub>O<sub>7</sub> (M+H)<sup>+</sup> 450.1989, found 450.1995.

**2',3',5'-Tri-*O*-acetyl-1-isopropyladenosine (4d).**

<sup>1</sup>H NMR (CDCl<sub>3</sub>, 400 MHz)  $\delta$  1.46 (d,  $J = 6.8$  Hz, 6H), 2.10 (s, 3H), 2.12 (s, 3H), 2.13 (s, 3H), 4.32-4.45 (m, 3H), 5.45 (hp,  $J = 6.8$  Hz, 1H), 5.64 (dd,  $J = 5.3, 5.1$  Hz, 1H), 5.89 (dd,  $J = 5.3, 5.1$  Hz, 1H), 6.00 (d,  $J = 5.1$  Hz, 1H), 7.73 (s, 1H), 7.80 (s, 1H). <sup>13</sup>C NMR (CDCl<sub>3</sub>, 100 MHz)  $\delta$  20.4, 20.5, 20.7, 22.4, 46.8, 63.1, 70.5, 73.1, 80.1, 86.8, 123.4, 138.0, 144.2, 150.0, 154.0, 169.3, 169.5, 170.4. HRMS (FAB) calcd for C<sub>19</sub>H<sub>26</sub>N<sub>5</sub>O<sub>7</sub> (M+H)<sup>+</sup> 436.1832, found 436.1836.

**2,4-Dinitrophenol (6).**

<sup>1</sup>H NMR (CDCl<sub>3</sub>, 400 MHz)  $\delta$  7.34 (d,  $J = 9.2$  Hz, 1H), 8.46 (dd,  $J = 2.8, 9.2$  Hz, 1H), 9.08 (d,  $J = 2.8$  Hz, 1H), 11.03 (s, 1H). <sup>13</sup>C NMR (CDCl<sub>3</sub>, 100 MHz)  $\delta$  121.2, 121.9, 131.6, 132.6, 140.3, 159.0. HRMS (EI) calcd for C<sub>6</sub>H<sub>4</sub>N<sub>2</sub>O<sub>5</sub> (M) 184.0120, found 184.0123.

**[<sup>18</sup>O]-2,4-Dinitrophenol (6<sup>o</sup>).**

HRMS (EI) calcd for C<sub>6</sub>H<sub>4</sub>N<sub>2</sub><sup>18</sup>OO<sub>4</sub> (M) 186.0163, found 186.0158.

**2',3',5'-Tri-*O*-acetyl-6-benzyladenosine.**

<sup>1</sup>H NMR (CDCl<sub>3</sub>, 400 MHz)  $\delta$  2.08 (s, 3H), 2.12 (s, 3H), 2.14 (s, 3H), 4.35-4.47 (m, 3H), 4.87 (bs, 2H), 5.68 (dd,  $J = 5.6, 4.4$  Hz, 1H), 5.93 (dd,  $J = 5.6, 5.2$  Hz, 1H), 6.13 (bs, 1H), 6.18 (d,  $J = 5.2$  Hz, 1H), 7.26-7.40 (m, 5H), 7.89 (s, 1H), 8.42 (s, 1H). <sup>13</sup>C NMR (CDCl<sub>3</sub>, 100 MHz)  $\delta$  20.4, 20.5, 20.8, 44.5, 63.1, 70.7, 73.2, 80.2, 86.1, 120.2, 127.6, 127.7, 128.7, 138.1, 138.3, 140.8, 153.5, 154.7, 169.4, 169.6, 170.4. HRMS (FAB) calcd for C<sub>23</sub>H<sub>26</sub>N<sub>5</sub>O<sub>7</sub> (M+H)<sup>+</sup> 484.1832, found 484.1835.
